# Supplementary material for: Influence of symmetry on the magneto-optical properties of a bifunctional macrocyclic DyIII complex
Source: Royal Society of Chemistry journal article supplement (doi:10.1039/d3dt03042c), 2023-01-01
Supplement: d3dt03042c1.pdf [file d3dt03042c1.pdf]

## SUPPORTING INFORMATION FOR

# Influence of Symmetry on Magneto-Optical properties of a Macrocyclic Dy<sup>III</sup> Complex

Yolimar Gil<sup>a\*</sup>, Ricardo Costa de Santana<sup>b</sup>, Andrés Vega<sup>c</sup>, Daniel Aravena<sup>d\*</sup>, Evgenia Spodine<sup>a</sup>.

<sup>a</sup> *Facultad de Ciencias Químicas y Farmacéuticas, Universidad de Chile, Olivos 1007, 8380544, Santiago, Chile.*

<sup>b</sup> *Instituto de Física, Universidade Federal de Goiás, Campus Samambaia, 74690-900, Goiânia (GO), Brazil.*

<sup>c</sup> *Departamento de Ciencias Químicas, Universidad Andrés Bello, Santiago, Chile*

<sup>d</sup> *Departamento de Química de los Materiales, Facultad de Química y Biología, Universidad de Santiago de Chile, Casilla 40, Correo 33, Santiago, Chile.*

### Table of contents

|                                         |    |
|-----------------------------------------|----|
| I. Synthesis and characterization ..... | 3  |
| II. X-ray crystallography .....         | 4  |
| III. Magnetic characterization .....    | 6  |
| IV. Magneto-structural correlation..... | 9  |
| V. Optical characterization .....       | 10 |
| VI. References.....                     | 11 |

## I. Synthesis and characterization

$[\text{Dy}(\text{L}^{\text{Pr}})(\text{NO}_3)_2] \cdot (\text{H}_2\text{O}) \cdot (\text{NO}_3)$  (**1**) was synthesized following a similar procedure previously reported<sup>1</sup>. A solution of  $\text{Dy}(\text{NO}_3)_3 \cdot 5\text{H}_2\text{O}$  (0.5 mmol) in 30 ml of acetonitrile was added with stirring to a solution of 2,6-pyridinedicarboxaldehyde (135 mg, 1 mmol) in 50 mL of the same solvent. Then, a solution of 1,3-diaminepropane (1 mmol) in 50 ml acetonitrile was added. The mixture was stirred for 4 h at room temperature. Pale amber block crystals were obtained by slow evaporation of the solutions after five weeks. Yield 0.138 g (38.7 %). Anal. calc. For:  $\text{C}_{20}\text{H}_{24}\text{DyN}_9\text{O}_{10}$ : C, 33.69; H, 3.39; N, 17.68 %. Found C, 33.74; H, 3.55; N, 17.37 %. IR ( $\text{cm}^{-1}$ ): 2962, 2870 (m, C-H), 1645 (m, C=N, imine), 1595 (m, C=N, py), 1456 and 1297 (s,  $\text{NO}_2$ , bidentate nitrate), 1380 (m,  $\text{NO}_2$ , nitrate anion) (Figure S1).

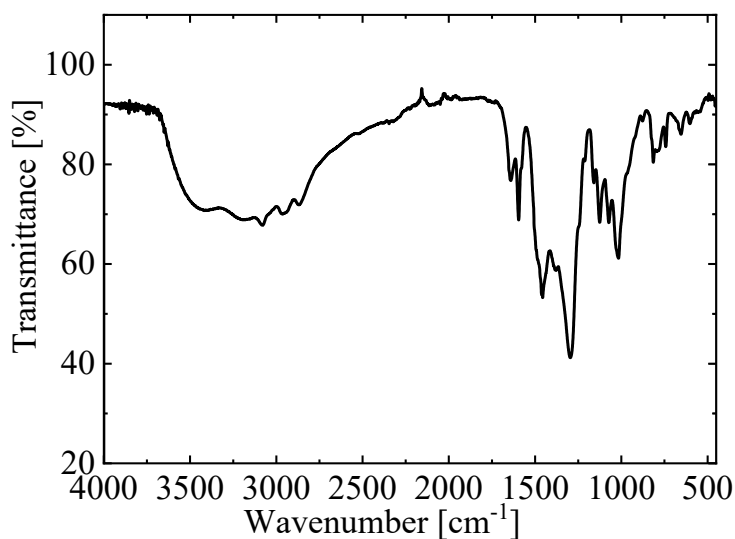

**Figure S1.** FTIR spectrum for **1**.

## II. X-ray crystallography

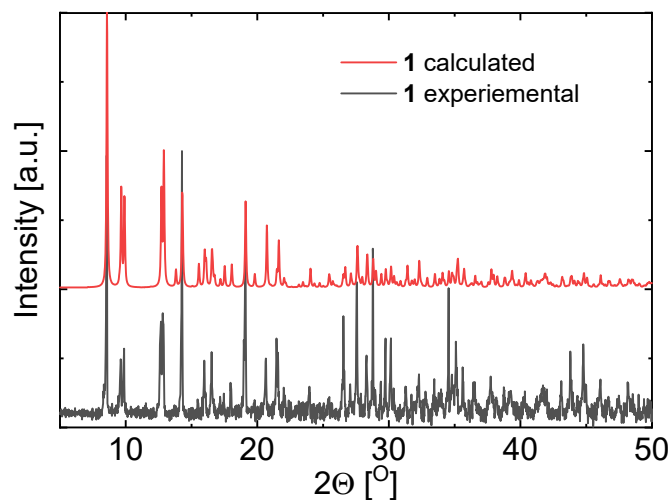

**Figure S2.** Comparison between experimental and calculated powder X-ray diffraction (PXRD) patterns for **1**.

**Table S1.** Crystal data and structure refinement details for **1**.

|                                                              | <b>1</b>                            |
|--------------------------------------------------------------|-------------------------------------|
| Chemical formula                                             | $C_{20}H_{24}DyN_9O_{10}$           |
| $M_r$                                                        | 712.98                              |
| Cr. Syst.                                                    | Monoclinic                          |
| Space gr.                                                    | $P2_1/c$                            |
| $a$ (Å), $b$ (Å), $c$ (Å)                                    | 13.4207(18), 18.561(3), 11.3906(15) |
| $\alpha$ (°), $\beta$ (°), $\gamma$ (°)                      | 90, 112.650(2), 90                  |
| $V$ (Å <sup>3</sup> )                                        | 2618.6(7)                           |
| $Z$                                                          | 4                                   |
| Radiation                                                    | Mo $K_\alpha$                       |
| $\mu$ (mm <sup>-1</sup> )                                    | 2.925                               |
| Crystal size (mm)                                            | 0.08 × 0.09 × 0.12                  |
| $T_{min}$ , $T_{max}$                                        | 0.789, 0.968                        |
| Total, unique, observed data [ $I > 2\sigma(I)$ ]            | 20158, 5129, 4447                   |
| $R_{int}$                                                    | 0.029                               |
| $R$ , $wR$ , $S$                                             | 0.0204, 0.0481, 1.03                |
| N. Ref, N. Par                                               | 5129, 370                           |
| $\Delta\rho_{max}$ , $\Delta\rho_{min}$ (e Å <sup>-3</sup> ) | -0.61, 1.00                         |

**Table S2.** Selected bond distances (Å) and angles (°) for **1**.

|             |           |             |           |
|-------------|-----------|-------------|-----------|
| Dy1 -N1     | 2.553(2)  | O5 -N8      | 1.264(3)  |
| Dy1 -N2     | 2.563(3)  | N1 -C1      | 1.333(4)  |
| Dy1 -N3     | 2.562(2)  | N1 -C5      | 1.342(4)  |
| Dy1 -N4     | 2.580(2)  | N2 -C6      | 1.265(4)  |
| Dy1 -N5     | 2.579(3)  | N2 -C7      | 1.464(4)  |
| Dy1 -N6     | 2.529(2)  | N3 -C9      | 1.471(5)  |
| Dy1 -O1     | 2.499(2)  | N3 -C10     | 1.269(4)  |
| Dy1 -O2     | 2.472(2)  | N4 -C11     | 1.335(4)  |
| Dy1 -O4     | 2.452(2)  | N4 -C15     | 1.336(4)  |
| Dy1 -O5     | 2.482(2)  | N5 -C16     | 1.267(4)  |
| O1 -N7      | 1.265(3)  | N5 -C17     | 1.463(4)  |
| O2 -N7      | 1.269(3)  | N6 -C19     | 1.467(4)  |
| O4 -N8      | 1.262(3)  | N6 -C20     | 1.272(4)  |
| O1 -Dy1 -O2 | 51.37(7)  | N2 -Dy1 -N3 | 67.33(8)  |
| O1 -Dy1 -O4 | 135.71(7) | N2 -Dy1 -N4 | 115.85(8) |
| O1 -Dy1 -O5 | 156.99(8) | N2 -Dy1 -N5 | 143.54(8) |
| O2 -Dy1 -O4 | 150.47(8) | N2 -Dy1 -N6 | 125.75(7) |
| O2 -Dy1 -O5 | 137.17(7) | N3 -Dy1 -N4 | 62.37(8)  |
| N1 -Dy1 -N2 | 62.58(7)  | N3 -Dy1 -N5 | 124.84(7) |
| N1 -Dy1 -N3 | 116.84(8) | N3 -Dy1 -N6 | 143.63(8) |
| N1 -Dy1 -N4 | 178.33(8) | N4 -Dy1 -N5 | 62.48(8)  |
| N1 -Dy1 -N5 | 118.32(7) | N4 -Dy1 -N6 | 118.39(8) |
| N1 -Dy1 -N6 | 63.18(8)  | N5 -Dy1 -N6 | 67.68(8)  |

**Table S3.** Continuous Shape Measurement calculations (CShM) of the first coordination sphere of **1**, referring to all standard 10 vertices of the polyhedron.

| <b>Polyhedron, ML10</b> | <b>1</b> |
|-------------------------|----------|
| Planar decagon          | 34.671   |
| Enneagonal pyramid      | 24.229   |
| Octagonal bipyramid     | 14.903   |
| Pentagonal prism        | 13.136   |
| Pentagonal antiprism    | 12.289   |

|                                         |              |
|-----------------------------------------|--------------|
| Bicapped cube J15                       | 9.518        |
| Bicapped square antiprism J17           | 3.387        |
| Metabidiminished icosahedron J62        | 7.016        |
| Augmented tridiminished icosahedron J64 | 19.874       |
| Sphenocorona J87                        | <b>3.204</b> |
| Staggered Dodecahedron (2:6:2)          | 5.155        |
| Tetradecahedron (2:6:2)                 | 3.825        |
| Hexadecahedron (2:6:2) or (1:4:4:1)     | 6.757        |

### III. Magnetic characterization

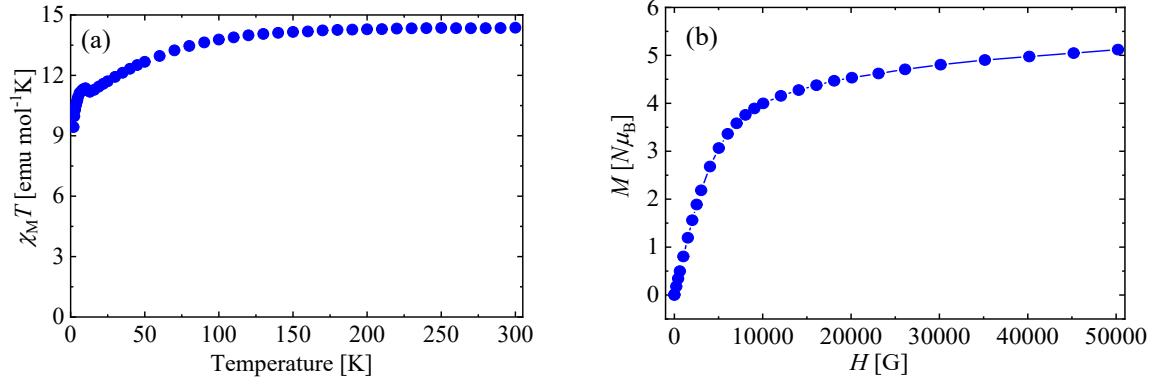

**Figure S3.** (a) Temperature dependence of the product  $\chi_M T$  with an applied field of 3 KOe. (b) Molar magnetization as a function of applied magnetic field at 2 K for **1**.

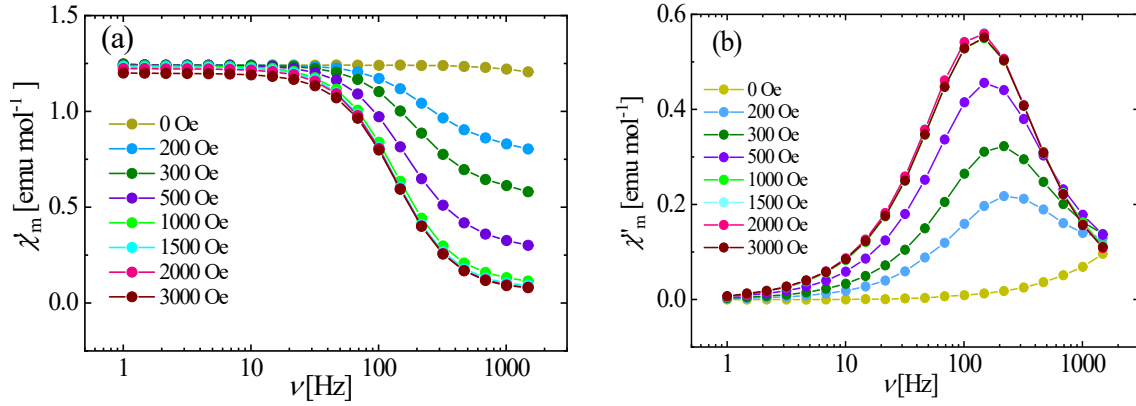

**Figure S4.** Dependence of the in-(left) and out-of-phase (right) susceptibility with the frequency at different static fields at 8K for **1**.

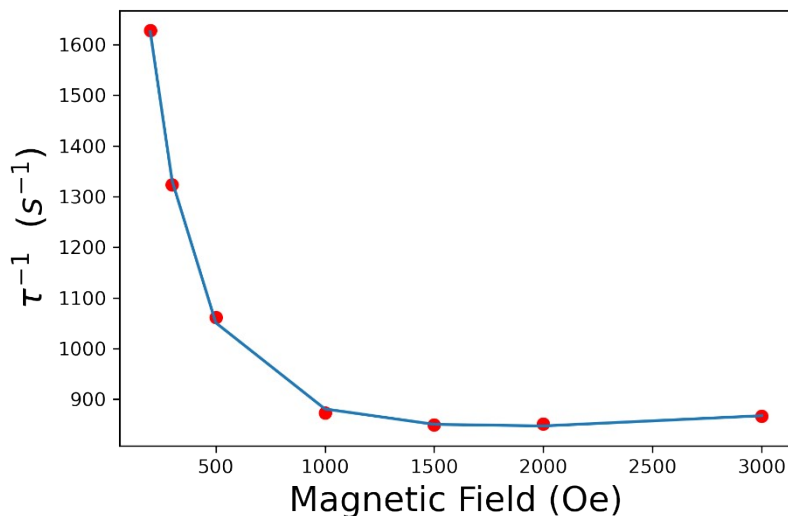

**Figure S5.** Field dependence of the relaxation time for **1** at 8K. Data were fitted to

$$\tau^{-1} = AH^2 + \frac{B_1}{1 + B_2H^2} + D$$

with parameters  $A = 6.04 \times 10^{-6} \text{ Oe}^{-2}\text{s}^{-1}$ ;  $B_1 = 1.49 \times 10^3 \text{ s}^{-1}$ ;  $B_2 = 2.04 \times 10^{-5} \text{ Oe}^{-2}$ ;  $D = 805.1 \text{ s}^{-1}$ .

**Table S4.** Parameters from the fit of Cole-Cole plots for **1**.

| T (K) | $\chi_S$ | $\chi_T$ | $\tau$   | $\alpha$ |
|-------|----------|----------|----------|----------|
| 4.10  | 1.66E-01 | 2.90     | 2.06E-01 | 2.11E-01 |
| 4.40  | 1.64E-01 | 2.38     | 8.96E-02 | 1.34E-01 |
| 4.70  | 1.58E-01 | 2.14     | 4.94E-02 | 9.47E-02 |
| 5.00  | 1.50E-01 | 1.98     | 3.00E-02 | 7.09E-02 |
| 5.30  | 1.43E-01 | 1.86     | 1.91E-02 | 5.58E-02 |
| 5.60  | 1.37E-01 | 1.75     | 1.27E-02 | 4.50E-02 |
| 5.90  | 1.31E-01 | 1.66     | 8.72E-03 | 3.75E-02 |
| 6.20  | 1.26E-01 | 1.59     | 6.15E-03 | 3.21E-02 |
| 6.50  | 1.22E-01 | 1.51     | 4.45E-03 | 2.75E-02 |
| 6.80  | 1.18E-01 | 1.45     | 3.28E-03 | 2.48E-02 |
| 7.10  | 1.15E-01 | 1.39     | 2.46E-03 | 2.15E-02 |
| 7.40  | 1.10E-01 | 1.34     | 1.88E-03 | 2.07E-02 |
| 7.80  | 1.07E-01 | 1.27     | 1.34E-03 | 1.82E-02 |
| 8.20  | 1.04E-01 | 1.21     | 9.81E-04 | 1.64E-02 |
| 8.60  | 1.01E-01 | 1.16     | 7.29E-04 | 1.49E-02 |
| 9.00  | 9.95E-02 | 1.11     | 5.51E-04 | 1.38E-02 |
| 9.40  | 9.66E-02 | 1.06     | 4.22E-04 | 1.36E-02 |
| 9.80  | 9.79E-02 | 1.02     | 3.29E-04 | 1.17E-02 |

|              |          |          |          |          |
|--------------|----------|----------|----------|----------|
| <b>10.30</b> | 9.61E-02 | 9.75E-01 | 2.43E-04 | 1.01E-02 |
| <b>10.75</b> | 9.62E-02 | 9.32E-01 | 1.82E-04 | 1.05E-02 |
| <b>11.20</b> | 9.78E-02 | 8.91E-01 | 1.36E-04 | 8.99E-03 |
| <b>11.70</b> | 1.04E-01 | 8.54E-01 | 1.03E-04 | 7.85E-03 |
| <b>12.30</b> | 1.09E-01 | 8.07E-01 | 6.86E-05 | 1.29E-02 |
| <b>12.90</b> | 1.38E-01 | 7.71E-01 | 5.08E-05 | 1.01E-02 |
| <b>13.50</b> | 1.94E-01 | 7.39E-01 | 3.91E-05 | 9.60E-03 |
| <b>14.10</b> | 2.22E-01 | 7.10E-01 | 2.76E-05 | 2.70E-02 |
| <b>15.00</b> | 3.49E-01 | 6.70E-01 | 2.08E-05 | 4.28E-02 |



#### IV. Magneto-structural correlation

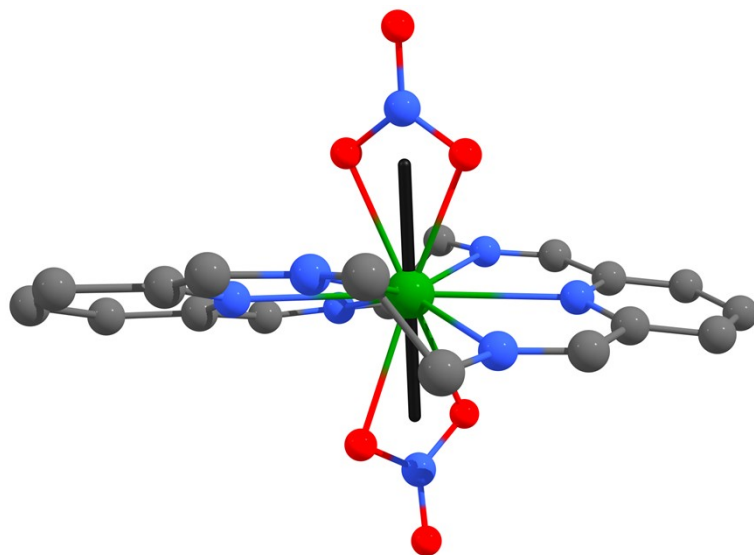

**Figure S6.** Calculated orientation of the main magnetic axis of the ground Kramers doublet for  $[\text{Dy}(\text{L}^{\text{N}6})(\text{NO}_3)_2](\text{BPh}_4)_2$ .

## V. Optical characterization

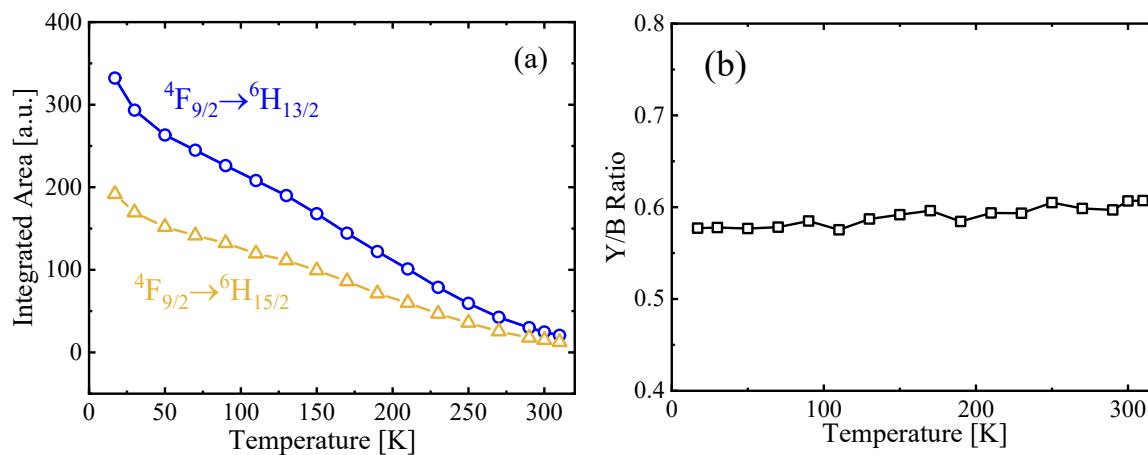

**Figure S7.** Thermal variation of (a) the integrated area of luminescence intensities for **1** for  ${}^4F_{9/2} \rightarrow {}^6H_{15/2}$  (blue, B) and  ${}^4F_{9/2} \rightarrow {}^6H_{13/2}$  (yellow, Y) transitions, and (b) of the Y/B ratio.

**Table S5.** CIE (x,y) coordinates and CCT (K) values for all complexes.

| T(K) | CIE (x,y)    | CCT(K) |
|------|--------------|--------|
| 310  | 0.278, 0.314 | 9080   |
| 17   | 0.293, 0.348 | 7383   |

## VI. References

- 1 P. Fuentealba, D. Villagra, Y. Gil, H. Aguilar-Bolados, Prof. R. C. de Santana, G. Gasparotto, A. Vega, J. Manzur and E. Spodine, *Eur. J. Inorg. Chem.*, 2021, **25**, 4543–4551.
- 2 P. Y. Liao, Y. Liu, Z. Y. Ruan, H. L. Wang, C. G. Shi, W. Deng, S. G. Wu, J. H. Jia and M. L. Tong, *Inorg. Chem.*, 2023, **62**, 1075–1085.
